# Supplementary material for: Modelling Microglial Innate Immune Memory In Vitro: Understanding the Role of Aerobic Glycolysis in Innate Immune Memory
Source: MDPI journal article supplement (doi:10.3390/ijms24108967), 2023-05-18
Supplement: s1 [file s1]

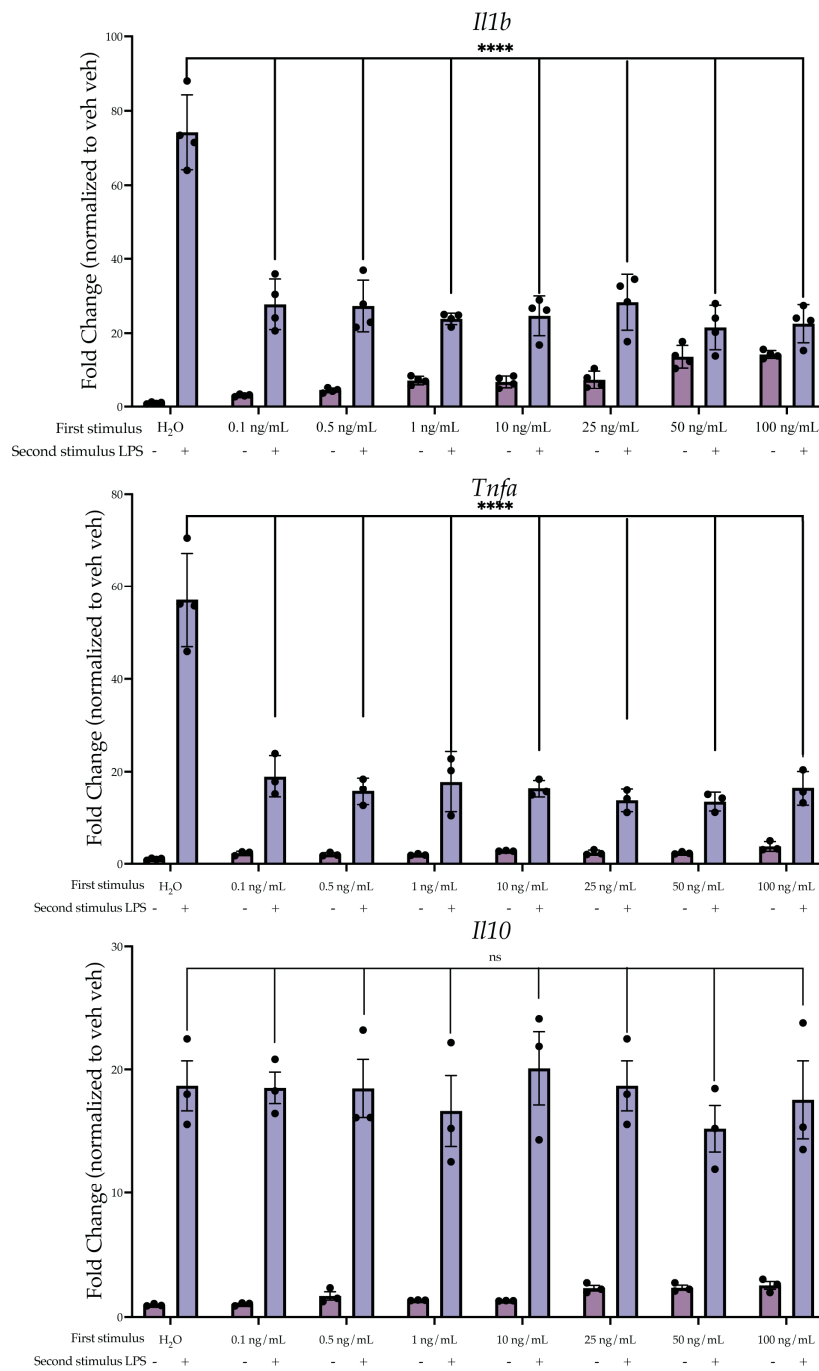

Figure S1: LPS induces tolerance regardless of dose *in vitro*. RT qPCR assessment of gene expression of *Il1b*, *Tnfa*, and *Il10* in BV2 cells treated with two stimuli of H<sub>2</sub>O or LPS. Gene expression assessed 3 hours after the second hit. n=1 independent experiments, 3 replicates per experiment. qPCR shown as bar graph of Log<sub>2</sub>(Fold Change) + SEM Tukey's post hoc significances denoted (\*\*\*\* p<0.0001).

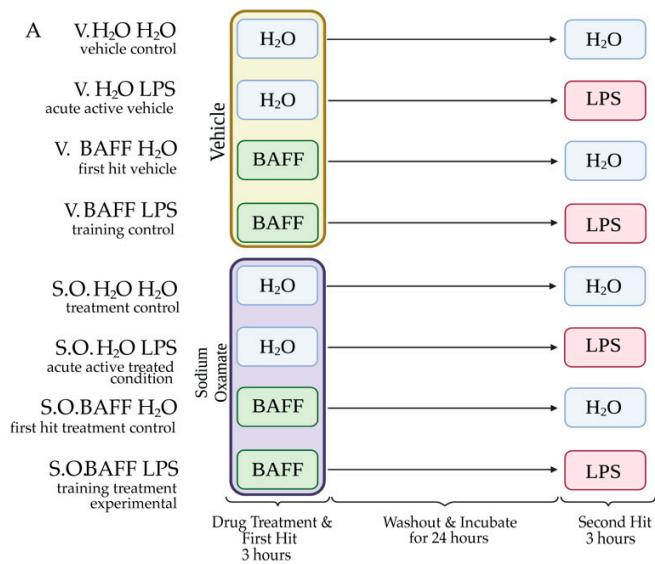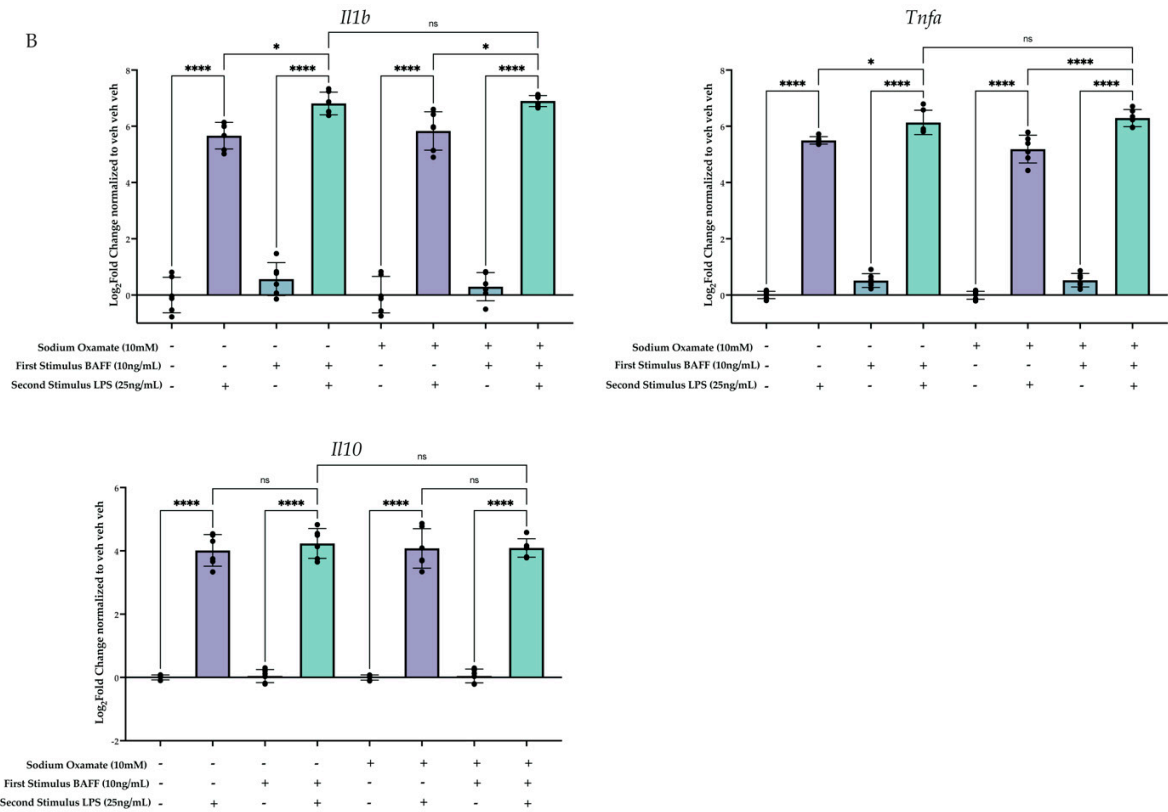

Figure S2: Sodium Oxamate treatment does not impact BAFF pretreatment induced training. (A) BV2 cells were treated with Sodium Oxamate (10mM) or vehicle concurrently with H<sub>2</sub>O or BAFF (10ng/mL) for 3 hours followed by washout. After 24 hours of incubation, the cells were treated with H<sub>2</sub>O or LPS (25ng/mL) for 3 hours prior to analysis. (B) RT-qPCR analysis of gene expression of proinflammatory cytokine *Il1b* and *Tnfa* assessed 3 hours after the second stimulus of LPS or H<sub>2</sub>O. n=3 independent experiments, 2 replicates per experiment. (C) RT-qPCR analysis of gene expression of anti-inflammatory cytokine *Il10* assessed 3 hours after the second stimulus of LPS or H<sub>2</sub>O. n=3 independent experiments, 2 replicates per experiment. qPCR shown as bar graph of Log<sub>2</sub>(Fold Change) + SEM Tukey's post hoc significances denoted (\*p<0.03, \*\*\*\* p<0.0001)
