# Supplementary material for: Modelling Microglial Innate Immune Memory In Vitro: Understanding the Role of Aerobic Glycolysis in Innate Immune Memory
Source: Int J Mol Sci. 2023 May 18;24(10):8967. doi: 10.3390/ijms24108967 (PMC10219556; doi:10.3390/ijms24108967)
Supplement: Supplementary file 1 [file ijms-24-08967-s001.zip › Tables S1-S7.xlsx]

## Sheet: Table S1
	PANEL	GENE	ANOVA Stats			Tukey's multiple comparisons
				F (DFn, DFd)	P value	Test	q	DF	Adjusted P Value
	B	Il1b	Interaction	F (1, 63) = 295.035056	P<0.0001	H2O:H2O vs. H2O:LPS	21.8253	63	<0.0001
			First	F (1, 63) = 766.102929	P<0.0001	H2O:H2O vs. LPS:H2O	44.6676	63	<0.0001
			Second	F (1, 63) = 26.1484367	P<0.0001	H2O:H2O vs. LPS:LPS	34.07	63	<0.0001
						H2O:LPS vs. LPS:H2O	21.7777	63	<0.0001
						H2O:LPS vs. LPS:LPS	10.5465	63	<0.0001
						LPS:H2O vs. LPS:LPS	12.3314	63	<0.0001
		Tnfa	Interaction	F (1, 52) = 187.581347	P<0.0001	H2O:H2O vs. H2O:LPS	13.4079	52	<0.0001
			First	F (1, 52) = 0.00667158665	P=0.9352	H2O:H2O vs. LPS:H2O	55.9503	52	<0.0001
			Second	F (1, 52) = 1858.95549	P<0.0001	H2O:H2O vs. LPS:LPS	44.6052	52	<0.0001
						H2O:LPS vs. LPS:H2O	41.7758	52	<0.0001
						H2O:LPS vs. LPS:LPS	29.8869	52	<0.0001
						LPS:H2O vs. LPS:LPS	13.9966	52	<0.0001
		Cxcl16	Interaction	F (1, 41) = 81.03	P<0.0001	H2O:H2O vs. H2O:LPS	6.482	41	0.0002
			First	F (1, 41) = 309.4	P<0.0001	H2O:H2O vs. LPS:H2O	26.93	41	<0.0001
			Second	F (1, 41) = 5.941	P=0.0192	H2O:H2O vs. LPS:LPS	15.69	41	<0.0001
						H2O:LPS vs. LPS:H2O	19.38	41	<0.0001
						H2O:LPS vs. LPS:LPS	8.479	41	<0.0001
						LPS:H2O vs. LPS:LPS	11.59	41	<0.0001
	C	IL10	Interaction	F (1, 41) = 13.26	P=0.0008	H2O:H2O vs. H2O:LPS	6.663	41	0.0002
			First	F (1, 41) = 931.3	P<0.0001	H2O:H2O vs. LPS:H2O	33.93	41	<0.0001
			Second	F (1, 41) = 10.45	P=0.0024	H2O:H2O vs. LPS:LPS	34.89	41	<0.0001
						H2O:LPS vs. LPS:H2O	26.45	41	<0.0001
						H2O:LPS vs. LPS:LPS	27.06	41	<0.0001
						LPS:H2O vs. LPS:LPS	0.4238	41	0.9905
		IL6	Interaction	F (1, 42) = 551.3	P<0.0001	H2O:H2O vs. H2O:LPS	47.54	42	<0.0001
			First	F (1, 42) = 3553	P<0.0001	H2O:H2O vs. LPS:H2O	81.47	42	<0.0001
			Second	F (1, 42) = 624.9	P<0.0001	H2O:H2O vs. LPS:LPS	86.35	42	<0.0001
						H2O:LPS vs. LPS:H2O	33.94	42	<0.0001
						H2O:LPS vs. LPS:LPS	36.87	42	<0.0001
						LPS:H2O vs. LPS:LPS	1.55	42	0.6938
	D	Phagocytosis	Interaction	F (1, 20) = 56.63	P<0.0001	H2O:H2O vs. H2O:LPS	7.91	20	<0.0001
			Second Hit	F (1, 20) = 48.25	P<0.0001	H2O:H2O vs. LPS:H2O	14.47	20	<0.0001
			First Hit	F (1, 20) = 0.1477	P=0.7048	H2O:H2O vs. LPS:LPS	7.33	20	0.0002
						H2O:LPS vs. LPS:H2O	6.562	20	0.0008
						H2O:LPS vs. LPS:LPS	0.5793	20	0.9762
						LPS:H2O vs. LPS:LPS	7.141	20	0.0003
	E	Nitrate Production	Interaction	F (1, 20) = 79.48	P<0.0001	H2O:H2O vs. H2O:LPS	6.397	20	0.0011
			Second Hit	F (1, 20) = 78.26	P<0.0001	H2O:H2O vs. LPS:H2O	17.76	20	<0.0001
			First Hit	F (1, 20) = 6.341	P=0.0204	H2O:H2O vs. LPS:LPS	6.329	20	0.0012
						H2O:LPS vs. LPS:H2O	11.36	20	<0.0001
						H2O:LPS vs. LPS:LPS	0.06869	20	>0.9999
						LPS:H2O vs. LPS:LPS	11.43	20	<0.0001

## Sheet: Table S2
	PANEL	GENE	ANOVA Stats			Tukey's multiple comparisons
				F (DFn, DFd)	P value	Test	q	DF	Adjusted P Value
	B	Il1b	Interaction	F (1, 28) = 7.830	P=0.0092	H2O:H2O vs. H2O:LPS	3.936	28	0.0445
			First	F (1, 28) = 2117	P<0.0001	H2O:H2O vs. LPS:H2O	43.21	28	<0.0001
			Second	F (1, 28) = 45.35	P<0.0001	H2O:H2O vs. LPS:LPS	52.74	28	<0.0001
						H2O:LPS vs. LPS:H2O	39.27	28	<0.0001
						H2O:LPS vs. LPS:LPS	48.81	28	<0.0001
						LPS:H2O vs. LPS:LPS	9.532	28	<0.0001
		Tnfa	Interaction	F (1, 28) = 8.845	P=0.0060	H2O:H2O vs. H2O:LPS	4.618	28	0.0144
			First	F (1, 28) = 11499	P<0.0001	H2O:H2O vs. LPS:H2O	104.3	28	<0.0001
			Second	F (1, 28) = 57.64	P<0.0001	H2O:H2O vs. LPS:LPS	114.8	28	<0.0001
						H2O:LPS vs. LPS:H2O	99.64	28	<0.0001
						H2O:LPS vs. LPS:LPS	110.2	28	<0.0001
						LPS:H2O vs. LPS:LPS	10.57	28	<0.0001
		Cxcl16	Interaction	F (1, 20) = 35.06	P<0.0001	H2O:H2O vs. H2O:LPS	1.101	20	0.8633
			First	F (1, 20) = 655.8	P<0.0001	H2O:H2O vs. LPS:H2O	19.69	20	<0.0001
			Second	F (1, 20) = 49.31	P<0.0001	H2O:H2O vs. LPS:LPS	32.63	20	<0.0001
						H2O:LPS vs. LPS:H2O	18.59	20	<0.0001
						H2O:LPS vs. LPS:LPS	31.53	20	<0.0001
						LPS:H2O vs. LPS:LPS	12.94	20	<0.0001
	C	IL10	Interaction	F (1, 20) = 0.1869	P=0.6701	H2O:H2O vs. H2O:LPS	0.4396	20	0.9893
			First	F (1, 20) = 1335	P<0.0001	H2O:H2O vs. LPS:H2O	36.11	20	<0.0001
			Second	F (1, 20) = 0.7603	P=0.3936	H2O:H2O vs. LPS:LPS	37.41	20	<0.0001
						H2O:LPS vs. LPS:H2O	35.67	20	<0.0001
						H2O:LPS vs. LPS:LPS	36.97	20	<0.0001
						LPS:H2O vs. LPS:LPS	1.304	20	0.7934
		IL6	Interaction	F (1, 42) = 551.3	P<0.0001	H2O:H2O vs. H2O:LPS	5.316	20	0.0062
			First	F (1, 42) = 3553	P<0.0001	H2O:H2O vs. LPS:H2O	83.74	20	<0.0001
			Second	F (1, 42) = 624.9	P<0.0001	H2O:H2O vs. LPS:LPS	84.05	20	<0.0001
						H2O:LPS vs. LPS:H2O	78.43	20	<0.0001
						H2O:LPS vs. LPS:LPS	78.73	20	<0.0001
						LPS:H2O vs. LPS:LPS	0.3058	20	0.9963
	D	Phagocytosis	Interaction	F (1, 20) = 5.866	P=0.0251	H2O:H2O vs. H2O:LPS	0.7116	20	0.9574
			Second Hit	F (1, 20) = 407.9	P<0.0001	H2O:H2O vs. LPS:H2O	17.78	20	<0.0001
			First Hit	F (1, 20) = 9.819	P=0.0052	H2O:H2O vs. LPS:LPS	23.33	20	<0.0001
						H2O:LPS vs. LPS:H2O	17.06	20	<0.0001
						H2O:LPS vs. LPS:LPS	22.62	20	<0.0001
						LPS:H2O vs. LPS:LPS	5.556	20	0.0043
	E	Nitrate Production	Interaction	F (1, 20) = 6.228	P=0.0214	H2O:H2O vs. H2O:LPS	2.192	20	0.4281
			Second Hit	F (1, 20) = 369.3	P<0.0001	H2O:H2O vs. LPS:H2O	16.72	20	<0.0001
			First Hit	F (1, 20) = 21.98	P=0.0001	H2O:H2O vs. LPS:LPS	23.9	20	<0.0001
						H2O:LPS vs. LPS:H2O	14.53	20	<0.0001
						H2O:LPS vs. LPS:LPS	21.71	20	<0.0001
						LPS:H2O vs. LPS:LPS	7.183	20	0.0003

## Sheet: Table S3
	PANEL	GENE	ANOVA		Tukey's multiple comparisons
			F (DFn, DFd)	P value	Test	q	DF	Adjusted P Value
	A	Il1b	F (2, 24) = 430.3	P<0.0001	veh vs. LPS	40.54	24	<0.0001
					veh vs. BAFF	8.583	24	<0.0001
					LPS vs. BAFF	25.87	24	<0.0001
		Tnfa	F (2, 30) = 1839	P<0.0001	veh vs. LPS	82.39	30	<0.0001
					veh vs. BAFF	9.301	30	<0.0001
					LPS vs. BAFF	55.1	30	<0.0001
	B	IL10	F (2, 23) = 886.0	P<0.0001	veh vs. LPS	56.63	23	<0.0001
					veh vs. BAFF	4.908	23	0.0057
					LPS vs. BAFF	40.34	23	<0.0001
		IL6	F (2, 15) = 883.7	P<0.0001	veh vs. LPS	55.55	15	<0.0001
					veh vs. BAFF	9.429	15	<0.0001
					LPS vs. BAFF	46.12	15	<0.0001
	C	Lactate	F (2, 15) = 88.52	P<0.0001	veh vs. LPS	17.46	15	<0.0001
					veh vs. BAFF	2.654	15	0.1796
					LPS vs. BAFF	14.81	15	<0.0001

## Sheet: Table S4
		PANEL	GENE	ANOVA Stats			Tukey's multiple comparisons
					F (DFn, DFd)	P value	Test	q	DF	Adjusted P Value
		B	Il1b	Interaction	F (1, 20) = 6.221	P=0.0215	veh:veh vs. veh:SO	0.1123	20	0.9998
				Stimulus	F (1, 20) = 807.7	P<0.0001	veh:veh vs. LPS:veh	30.91	20	<0.0001
				DRUG	F (1, 20) = 5.674	P=0.0273	veh:veh vs. LPS:SO	26.04	20	<0.0001
							veh:SO vs. LPS:veh	30.8	20	<0.0001
							veh:SO vs. LPS:SO	25.93	20	<0.0001
							LPS:veh vs. LPS:SO	4.876	20	0.0125
			Tnfa	Interaction	F (1, 20) = 6.535	P=0.0188	veh:veh vs. veh:SO	0.01405	20	>0.9999
				Stimulus	F (1, 20) = 1852	P<0.0001	veh:veh vs. LPS:veh	45.59	20	<0.0001
				DRUG	F (1, 20) = 6.463	P=0.0194	veh:veh vs. LPS:SO	40.49	20	<0.0001
							veh:SO vs. LPS:veh	45.58	20	<0.0001
							veh:SO vs. LPS:SO	40.48	20	<0.0001
							LPS:veh vs. LPS:SO	5.099	20	0.0088
		C	IL10	Interaction	F (1, 20) = 5.413	P=0.0306	veh:veh vs. veh:SO	0.4396	20	0.9893
				Stimulus	F (1, 20) = 160.4	P<0.0001	veh:veh vs. LPS:veh	36.11	20	<0.0001
				DRUG	F (1, 20) = 5.278	P=0.0325	veh:veh vs. LPS:SO	37.41	20	<0.0001
							veh:SO vs. LPS:veh	35.67	20	<0.0001
							veh:SO vs. LPS:SO	36.97	20	<0.0001
							LPS:veh vs. LPS:SO	1.304	20	0.7934
			IL6	Interaction	F (1, 20) = 3.515	P=0.0755	veh:veh vs. veh:SO	0.6263	20	0.9702
				Stimulus	F (1, 20) = 576.0	P<0.0001	veh:veh vs. LPS:veh	25.87	20	<0.0001
				DRUG	F (1, 20) = 6.255	P=0.0212	veh:veh vs. LPS:SO	21.5	20	<0.0001
							veh:SO vs. LPS:veh	26.5	20	<0.0001
							veh:SO vs. LPS:SO	22.12	20	<0.0001
							LPS:veh vs. LPS:SO	4.376	20	0.027
		D	Lactate	Interaction	F (1, 20) = 85.14	P<0.0001	veh:veh vs. veh:SO	3.308	20	0.1226
				Stimulus	F (1, 20) = 148.2	P<0.0001	veh:veh vs. LPS:veh	21.4	20	<0.0001
				DRUG	F (1, 20) = 157.1	P<0.0001	veh:veh vs. LPS:SO	0.3596	20	0.994
							veh:SO vs. LPS:veh	24.71	20	<0.0001
							veh:SO vs. LPS:SO	2.948	20	0.1921
							LPS:veh vs. LPS:SO	21.76	20	<0.0001

## Sheet: Table S5
	PANEL	GENE	ANOVA Stats			Tukey's multiple comparisons
				F (DFn, DFd)	P value	Test	q	DF	Adjusted P Value
	B	Il1b	DRUG	F (1, 61) = 31.59	P<0.0001	veh:veh veh vs. veh:veh LPS	24.74	61	<0.0001
			First Hit	F (1, 61) = 0.3240	P=0.5713	veh:veh veh vs. veh:LPS veh	2.06	61	0.8266
			Second Hit	F (1, 61) = 967.2	P<0.0001	veh:veh veh vs. veh:LPS LPS	15.77	61	<0.0001
			DRUG x First Hit	F (1, 61) = 17.68	P<0.0001	veh:veh veh vs. SO:veh veh	0.2785	61	>0.9999
			DRUG x Second Hit	F (1, 61) = 20.51	P<0.0001	veh:veh veh vs. SO:veh LPS	26.5	61	<0.0001
			Second Hit x First Hit	F (1, 61) = 16.91	P=0.0001	veh:veh veh vs. SO:LPS veh	3.253	61	0.3106
			DRUG x Second Hit x First Hit	F (1, 61) = 12.32	P=0.0008	veh:veh veh vs. SO:LPS LPS	27.84	61	<0.0001
						veh:veh LPS vs. veh:LPS veh	22.68	61	<0.0001
						veh:veh LPS vs. veh:LPS LPS	8.968	61	<0.0001
						veh:veh LPS vs. SO:veh veh	23.72	61	<0.0001
						veh:veh LPS vs. SO:veh LPS	1.761	61	0.9147
						veh:veh LPS vs. SO:LPS veh	20.75	61	<0.0001
						veh:veh LPS vs. SO:LPS LPS	3.838	61	0.1381
						veh:LPS veh vs. veh:LPS LPS	13.71	61	<0.0001
						veh:LPS veh vs. SO:veh veh	1.72	61	0.9239
						veh:LPS veh vs. SO:veh LPS	24.44	61	<0.0001
						veh:LPS veh vs. SO:LPS veh	1.254	61	0.9862
						veh:LPS veh vs. SO:LPS LPS	25.84	61	<0.0001
						veh:LPS LPS vs. SO:veh veh	15.02	61	<0.0001
						veh:LPS LPS vs. SO:veh LPS	10.73	61	<0.0001
						veh:LPS LPS vs. SO:LPS veh	12.05	61	<0.0001
						veh:LPS LPS vs. SO:LPS LPS	12.54	61	<0.0001
						SO:veh veh vs. SO:veh LPS	25.43	61	<0.0001
						SO:veh veh vs. SO:LPS veh	2.89	61	0.4622
						SO:veh veh vs. SO:LPS LPS	26.78	61	<0.0001
						SO:veh LPS vs. SO:LPS veh	22.46	61	<0.0001
						SO:veh LPS vs. SO:LPS LPS	2.13	61	0.8013
						SO:LPS veh vs. SO:LPS LPS	23.89	61	<0.0001
		Tnfa	DRUG	F (1, 60) = 29.65	P<0.0001	veh:veh veh vs. veh:veh LPS	26.47	60	<0.0001
			First Hit	F (1, 60) = 4.299	P=0.0424	veh:veh veh vs. veh:LPS veh	3.761	60	0.1556
			Second Hit	F (1, 60) = 892.1	P<0.0001	veh:veh veh vs. veh:LPS LPS	12.46	60	<0.0001
			DRUG x First Hit	F (1, 60) = 26.80	P<0.0001	veh:veh veh vs. SO:veh veh	0.6695	60	0.9997
			DRUG x Second Hit	F (1, 60) = 25.02	P<0.0001	veh:veh veh vs. SO:veh LPS	26.16	60	<0.0001
			Second Hit x First Hit	F (1, 60) = 47.08	P<0.0001	veh:veh veh vs. SO:LPS veh	3.595	60	0.1984
			DRUG x Second Hit x First Hit	F (1, 60) = 32.58	P<0.0001	veh:veh veh vs. SO:LPS LPS	26.76	60	<0.0001
						veh:veh LPS vs. veh:LPS veh	23.41	60	<0.0001
						veh:veh LPS vs. veh:LPS LPS	14.45	60	<0.0001
						veh:veh LPS vs. SO:veh veh	25.78	60	<0.0001
						veh:veh LPS vs. SO:veh LPS	0.3194	60	>0.9999
						veh:veh LPS vs. SO:LPS veh	22.77	60	<0.0001
						veh:veh LPS vs. SO:LPS LPS	1.069	60	0.9947
						veh:LPS veh vs. veh:LPS LPS	8.963	60	<0.0001
						veh:LPS veh vs. SO:veh veh	3.072	60	0.3826
						veh:LPS veh vs. SO:veh LPS	23.09	60	<0.0001
						veh:LPS veh vs. SO:LPS veh	0.0624	60	>0.9999
						veh:LPS veh vs. SO:LPS LPS	23.78	60	<0.0001
						veh:LPS LPS vs. SO:veh veh	11.77	60	<0.0001
						veh:LPS LPS vs. SO:veh LPS	14.13	60	<0.0001
						veh:LPS LPS vs. SO:LPS veh	8.757	60	<0.0001
						veh:LPS LPS vs. SO:LPS LPS	15.08	60	<0.0001
						SO:veh veh vs. SO:veh LPS	25.47	60	<0.0001
						SO:veh veh vs. SO:LPS veh	2.925	60	0.4466
						SO:veh veh vs. SO:LPS LPS	26.1	60	<0.0001
						SO:veh LPS vs. SO:LPS veh	22.46	60	<0.0001
						SO:veh LPS vs. SO:LPS LPS	1.379	60	0.9763
						SO:LPS veh vs. SO:LPS LPS	23.17	60	<0.0001
	C	IL10	Drug	F (1, 61) = 3.501	P=0.0661	veh:veh veh vs. veh:veh LPS	24.18	61	<0.0001
			First Hit	F (1, 61) = 9.933	P=0.0025	veh:veh veh vs. veh:LPS veh	4.696	61	0.0308
			Second Hit	F (1, 61) = 900.6	P<0.0001	veh:veh veh vs. veh:LPS LPS	23.34	61	<0.0001
			Drug x First Hit	F (1, 61) = 0.2356	P=0.6291	veh:veh veh vs. SO:veh veh	0.8002	61	0.9991
			Drug x Second Hit	F (1, 61) = 0.1687	P=0.6827	veh:veh veh vs. SO:veh LPS	25.36	61	<0.0001
			First Hit x Second Hit	F (1, 61) = 13.39	P=0.0005	veh:veh veh vs. SO:LPS veh	5.806	61	0.0029
			Drug x First Hit x Second Hit	F (1, 61) = 0.02728	P=0.8694	veh:veh veh vs. SO:LPS LPS	24.71	61	<0.0001
						veh:veh LPS vs. veh:LPS veh	19.49	61	<0.0001
						veh:veh LPS vs. veh:LPS LPS	0.838	61	0.9989
						veh:veh LPS vs. SO:veh veh	22.66	61	<0.0001
						veh:veh LPS vs. SO:veh LPS	1.18	61	0.9904
						veh:veh LPS vs. SO:LPS veh	17.65	61	<0.0001
						veh:veh LPS vs. SO:LPS LPS	1.245	61	0.9868
						veh:LPS veh vs. veh:LPS LPS	18.65	61	<0.0001
						veh:LPS veh vs. SO:veh veh	3.756	61	0.1566
						veh:LPS veh vs. SO:veh LPS	20.67	61	<0.0001
						veh:LPS veh vs. SO:LPS veh	1.25	61	0.9865
						veh:LPS veh vs. SO:LPS LPS	20.15	61	<0.0001
						veh:LPS LPS vs. SO:veh veh	21.85	61	<0.0001
						veh:LPS LPS vs. SO:veh LPS	2.018	61	0.8412
						veh:LPS LPS vs. SO:LPS veh	16.84	61	<0.0001
						veh:LPS LPS vs. SO:LPS LPS	2.058	61	0.8274
						SO:veh veh vs. SO:veh LPS	23.81	61	<0.0001
						SO:veh veh vs. SO:LPS veh	4.864	61	0.0221
						SO:veh veh vs. SO:LPS LPS	23.23	61	<0.0001
						SO:veh LPS vs. SO:LPS veh	18.8	61	<0.0001
						SO:veh LPS vs. SO:LPS LPS	0.1003	61	>0.9999
						SO:LPS veh vs. SO:LPS LPS	18.37	61	<0.0001

## Sheet: Table S6
		PANEL	GENE	ANOVA Stats			Tukey's multiple comparisons
					F (DFn, DFd)	P value	Test	q	DF	Adjusted P Value
		B	Phagocytosis	DRUG	F (1, 64) = 16.82	P=0.0001	veh:veh veh vs. veh:veh LPS	17.48	64	<0.0001
				First Hit	F (1, 64) = 15.93	P=0.0002	veh:veh veh vs. veh:LPS veh	3.192	64	0.3331
				Second Hit	F (1, 64) = 263.6	P<0.0001	veh:veh veh vs. veh:LPS LPS	2.83	64	0.4894
				DRUG x First Hit	F (1, 64) = 16.92	P=0.0001	veh:veh veh vs. SO:veh veh	0.3926	64	>0.9999
				DRUG x Second Hit	F (1, 64) = 17.05	P=0.0001	veh:veh veh vs. SO:veh LPS	17.86	64	<0.0001
				Second Hit x First Hit	F (1, 64) = 81.60	P<0.0001	veh:veh veh vs. SO:LPS veh	3.545	64	0.2114
				DRUG x Second Hit x First Hit	F (1, 64) = 12.86	P=0.0006	veh:veh veh vs. SO:LPS LPS	14.09	64	<0.0001
							veh:veh LPS vs. veh:LPS veh	14.29	64	<0.0001
							veh:veh LPS vs. veh:LPS LPS	14.65	64	<0.0001
							veh:veh LPS vs. SO:veh veh	17.88	64	<0.0001
							veh:veh LPS vs. SO:veh LPS	0.376	64	>0.9999
							veh:veh LPS vs. SO:LPS veh	13.94	64	<0.0001
							veh:veh LPS vs. SO:LPS LPS	3.39	64	0.2606
							veh:LPS veh vs. veh:LPS LPS	0.3624	64	>0.9999
							veh:LPS veh vs. SO:veh veh	3.585	64	0.2
							veh:LPS veh vs. SO:veh LPS	14.67	64	<0.0001
							veh:LPS veh vs. SO:LPS veh	0.3531	64	>0.9999
							veh:LPS veh vs. SO:LPS LPS	10.9	64	<0.0001
							veh:LPS LPS vs. SO:veh veh	3.222	64	0.3213
							veh:LPS LPS vs. SO:veh LPS	15.03	64	<0.0001
							veh:LPS LPS vs. SO:LPS veh	0.7155	64	0.9996
							veh:LPS LPS vs. SO:LPS LPS	11.26	64	<0.0001
							SO:veh veh vs. SO:veh LPS	18.25	64	<0.0001
							SO:veh veh vs. SO:LPS veh	3.938	64	0.1172
							SO:veh veh vs. SO:LPS LPS	14.49	64	<0.0001
							SO:veh LPS vs. SO:LPS veh	14.31	64	<0.0001
							SO:veh LPS vs. SO:LPS LPS	3.766	64	0.1533
							SO:LPS veh vs. SO:LPS LPS	10.55	64	<0.0001
		C	NO	Drug	F (1, 40) = 17.47	P=0.0002	veh:veh veh vs. veh:veh LPS	16.6	40	<0.0001
				First Hit	F (1, 40) = 4.724	P=0.0357	veh:veh veh vs. veh:LPS veh	5.978	40	0.0031
				Second Hit	F (1, 40) = 222.2	P<0.0001	veh:veh veh vs. veh:LPS LPS	5.913	40	0.0035
				Drug x First Hit	F (1, 40) = 1.332	P=0.2554	veh:veh veh vs. SO:veh veh	1.425	40	0.9705
				Drug x Second Hit	F (1, 40) = 10.34	P=0.0026	veh:veh veh vs. SO:veh LPS	19.45	40	<0.0001
				First Hit x Second Hit	F (1, 40) = 91.70	P<0.0001	veh:veh veh vs. SO:LPS veh	5.917	40	0.0035
				Drug x First Hit x Second Hit	F (1, 40) = 4.862	P=0.0333	veh:veh veh vs. SO:LPS LPS	13.52	40	<0.0001
							veh:veh LPS vs. veh:LPS veh	10.62	40	<0.0001
							veh:veh LPS vs. veh:LPS LPS	10.68	40	<0.0001
							veh:veh LPS vs. SO:veh veh	15.17	40	<0.0001
							veh:veh LPS vs. SO:veh LPS	2.854	40	0.4831
							veh:veh LPS vs. SO:LPS veh	10.68	40	<0.0001
							veh:veh LPS vs. SO:LPS LPS	3.079	40	0.3864
							veh:LPS veh vs. veh:LPS LPS	0.06419	40	>0.9999
							veh:LPS veh vs. SO:veh veh	4.552	40	0.0473
							veh:LPS veh vs. SO:veh LPS	13.47	40	<0.0001
							veh:LPS veh vs. SO:LPS veh	0.06087	40	>0.9999
							veh:LPS veh vs. SO:LPS LPS	7.54	40	0.0001
							veh:LPS LPS vs. SO:veh veh	4.488	40	0.0529
							veh:LPS LPS vs. SO:veh LPS	13.54	40	<0.0001
							veh:LPS LPS vs. SO:LPS veh	0.003322	40	>0.9999
							veh:LPS LPS vs. SO:LPS LPS	7.604	40	<0.0001
							SO:veh veh vs. SO:veh LPS	18.03	40	<0.0001
							SO:veh veh vs. SO:LPS veh	4.491	40	0.0526
							SO:veh veh vs. SO:LPS LPS	12.09	40	<0.0001
							SO:veh LPS vs. SO:LPS veh	13.53	40	<0.0001
							SO:veh LPS vs. SO:LPS LPS	5.933	40	0.0034
							SO:LPS veh vs. SO:LPS LPS	7.601	40	<0.0001

## Sheet: Table S7
	PANEL	GENE	ANOVA Stats			Tukey's multiple comparisons
				F (DFn, DFd)	P value	Test	q	DF	Adjusted P Value
	A	Tolerance Lactate	Interaction	F (1, 20) = 100.7	P<0.0001	veh:veh vs. veh:LPS	20.1	20	<0.0001
			Second Hit	F (1, 20) = 27.59	P<0.0001	veh:veh vs. LPS:veh	4.784	20	0.0144
			First Hit	F (1, 20) = 101.3	P<0.0001	veh:veh vs. LPS:LPS	4.812	20	0.0138
						veh:LPS vs. LPS:veh	15.32	20	<0.0001
						veh:LPS vs. LPS:LPS	15.29	20	<0.0001
						LPS:veh vs. LPS:LPS	0.02777	20	>0.9999
	B	Training Lactate	Interaction	F (1, 20) = 8.681	P=0.0080	veh:veh vs. veh:BAFF	1.361	20	0.7719
			Second Hit	F (1, 20) = 414.5	P<0.0001	veh:veh vs. LPS:veh	17.41	20	<0.0001
			First Hit	F (1, 20) = 18.55	P=0.0003	veh:veh vs. LPS:BAFF	24.67	20	<0.0001
						veh:BAFF vs. LPS:veh	16.05	20	<0.0001
						veh:BAFF vs. LPS:BAFF	23.31	20	<0.0001
						LPS:veh vs. LPS:BAFF	7.254	20	0.0003
	C	SO Tolerance Lactate	DRUG	F (1, 40) = 29.56	P<0.0001	veh:veh veh vs. veh:veh LPS	17.15	40	<0.0001
			First Hit	F (1, 40) = 7.017	P=0.0115	veh:veh veh vs. veh:LPS veh	4.082	40	0.1026
			Second Hit	F (1, 40) = 254.2	P<0.0001	veh:veh veh vs. veh:LPS LPS	4.106	40	0.0989
			DRUG x First Hit	F (1, 40) = 13.60	P=0.0007	veh:veh veh vs. SO:veh veh	2.187	40	0.778
			DRUG x Second Hit	F (1, 40) = 14.44	P=0.0005	veh:veh veh vs. SO:veh LPS	17.44	40	<0.0001
			Second Hit x First Hit	F (1, 40) = 48.53	P<0.0001	veh:veh veh vs. SO:LPS veh	4.211	40	0.0837
			DRUG x Second Hit x First Hit	F (1, 40) = 26.46	P<0.0001	veh:veh veh vs. SO:LPS LPS	16.88	40	<0.0001
						veh:veh LPS vs. veh:LPS veh	13.07	40	<0.0001
						veh:veh LPS vs. veh:LPS LPS	13.04	40	<0.0001
						veh:veh LPS vs. SO:veh veh	14.96	40	<0.0001
						veh:veh LPS vs. SO:veh LPS	0.2859	40	>0.9999
						veh:veh LPS vs. SO:LPS veh	12.94	40	<0.0001
						veh:veh LPS vs. SO:LPS LPS	0.2683	40	>0.9999
						veh:LPS veh vs. veh:LPS LPS	0.02369	40	>0.9999
						veh:LPS veh vs. SO:veh veh	1.895	40	0.8777
						veh:LPS veh vs. SO:veh LPS	13.35	40	<0.0001
						veh:LPS veh vs. SO:LPS veh	0.1287	40	>0.9999
						veh:LPS veh vs. SO:LPS LPS	12.8	40	<0.0001
						veh:LPS LPS vs. SO:veh veh	1.919	40	0.8708
						veh:LPS LPS vs. SO:veh LPS	13.33	40	<0.0001
						veh:LPS LPS vs. SO:LPS veh	0.105	40	>0.9999
						veh:LPS LPS vs. SO:LPS LPS	12.78	40	<0.0001
						SO:veh veh vs. SO:veh LPS	15.25	40	<0.0001
						SO:veh veh vs. SO:LPS veh	2.024	40	0.8373
						SO:veh veh vs. SO:LPS LPS	14.7	40	<0.0001
						SO:veh LPS vs. SO:LPS veh	13.23	40	<0.0001
						SO:veh LPS vs. SO:LPS LPS	0.5542	40	>0.9999
						SO:LPS veh vs. SO:LPS LPS	12.67	40	<0.0001
